# Supplementary material
Source: PubMed Central journal article supplement (PMC5498110)
Supplement: NIHMS871577-supplement-Supplement.pdf [file NIHMS871577-supplement-Supplement.pdf]

## Supplementary Online Content

Mucci LA, Hjelmborg JB, Harris JR, et al, for the Nordic Twin Study of Cancer (NorTwinCan) Collaboration. Familial risk and heritability of cancer among twins in Nordic countries. *JAMA*. doi:10.1001/jama.2015.17703

**eTable.** Estimates of heritability and shared environment for selected malignancies<sup>1</sup> in the NorTwinCan cohort and in comparison to Lichtenstein et al

This supplementary material has been provided by the authors to give readers additional information about their work.

**eTable.** Estimates of heritability and shared environment for selected malignancies<sup>1</sup> in the NorTwinCan cohort and in comparison to Lichtenstein *et al*

|                                      | NorTwinCan 2014             |                                      | Lichtenstein 2000 |
|--------------------------------------|-----------------------------|--------------------------------------|-------------------|
|                                      | Heritability<br>(%, 95% CI) | Shared<br>environment<br>(%, 95% CI) | Heritability      |
| <b>Overall cancer</b>                | 33% (30-37%)                | 0%                                   | N/A               |
| <b>Head and neck</b>                 | 9% (0-60%)                  | 26% (0-65%)                          | N/A               |
| <b>Stomach</b>                       | 22% (0-55%)                 | 6% (0-31%)                           | 28%               |
| <b>Colon</b>                         | 15% (0-45%)                 | 16% (0-38%)                          | 35% <sup>2</sup>  |
| <b>Rectum and anus</b>               | 14% (0-50%)                 | 10% (0-38%)                          | 35% <sup>2</sup>  |
| <b>Lung</b>                          | 18% (0-42%)                 | 24% (7-40%)                          | 26%               |
| <b>Skin, melanoma</b>                | 58% (43-73%)                | 0%                                   | N/A               |
| <b>Skin, non-melanoma</b>            | 43% (26-59%)                | 0%                                   | N/A               |
| <b>Breast</b>                        | 31% (11-51%)                | 16% (0-31%)                          | 27%               |
| <b>Corpus uteri</b>                  | 27% (11-43%)                | 0%                                   | 0%                |
| <b>Ovary</b>                         | 39% (23-55%)                | 0%                                   | 22%               |
| <b>Prostate</b>                      | 57% (51-63%)                | 0%                                   | 42%               |
| <b>Testis</b>                        | 37% (0-93%)                 | 24% (0-70%)                          | N/A               |
| <b>Kidney</b>                        | 38% (21-55%)                | 0%                                   | N/A               |
| <b>Bladder, other urinary organs</b> | 30% (0-67%)                 | 0%                                   | 31%               |
| <b>Leukemia, other</b>               | 57% (0-100%)                | 0%                                   | N/A               |

<sup>1</sup> Familial risk estimates were not calculated for cancer sites with less than 5 concordant pairs

<sup>2</sup> Lichtenstein *et al* presented data for colon and rectum combined

N/A = data not available
